# Supplementary material for: Randomized controlled trial of individualized treatment summary and survivorship care plans for hematopoietic cell transplantation survivors
Source: PubMed Central journal article supplement — Haematologica. 2018 Dec 4;104(5):1084–92. doi: 10.3324/haematol.2018.203919 (PMC6518896; doi:10.3324/haematol.2018.203919), 2019-05
Supplement: 2018_203919-Disclosures_and_Contributions.pdf [file 2018_203919-Disclosures_and_Contributions.pdf]

Haematologica  
HAEMATOL/2018/203919  
Version 3

Randomized controlled trial of individualized treatment summary and survivorship care plans for hematopoietic cell transplantation survivors

Navneet S. Majhail, Elizabeth Murphy, Purushottam Laud, Jaime M. Preussler, Ellen M. Denzen, Beatrice Abetti, Alexia Adams, RaeAnne Besser, Linda J. Burns, Jan Cerny, Rebecca Drexler, Theresa Hahn, Lensa Idossa, Balkrishna Jahagirdar, Naynesh Kamani, Alison Loren, Deborah Mattila, Joseph McGuirk, Heather Moore, Jana Reynolds, Wael Saber, Lizette Salazar, Barry Schatz, Patrick Stiff, John R. Wingard, Karen L. Syrjala, and K Scott Baker

Disclosures: None of the authors has a relevant financial conflict of interest in relationship to this study.

Contributions: Study Conception and Design: All authors Collection and Assembly of Data: Jaime Preussler, Alexia Adams, RaeAnne Besser, Ellen Denzen, Deborah Matilla Performed Statistical Analysis: Jaime Preussler, Purushottam Laud Data Analysis and Interpretation: All authors Drafting of Manuscript: Navneet Majhail, Jaime Preussler, Purushottam Laud Critical Review and Final Approval of Manuscript: All authors
